# Supplementary material
Source: publisher site journal article supplement (https://www.spandidos-publications.com/2777/downloadSupplementary)

Figure S1. RAW 264.7 cells treated with PBS (negative control) had no significant change in the expression of genes as determined by RT-PCR. Data are presented as the mean  $\pm$  standard deviation (three repeats). VASP, vasodilator-stimulated phosphoprotein; TRAP, tartrate-resistant acid phosphatase.

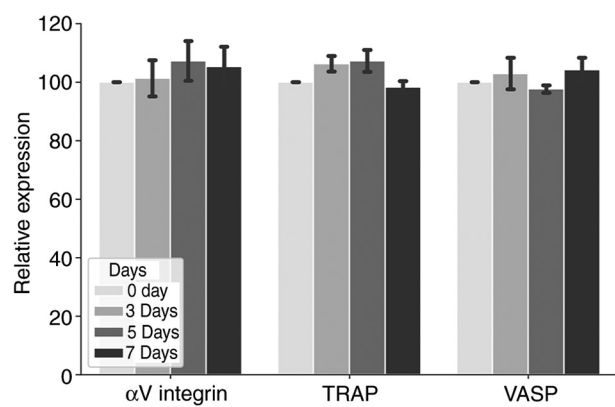

Figure S2. Trypan blue exclusion assay (viability assay). Viability of RAW 264.7 was determined before proceeding to TARP staining in different treatment groups. No significant change observed among different treatments were observed. Data are presented as the mean  $\pm$  standard deviation (three repeats). VASP, vasodilator-stimulated phosphoprotein; NC, negative control; si, small interfering.

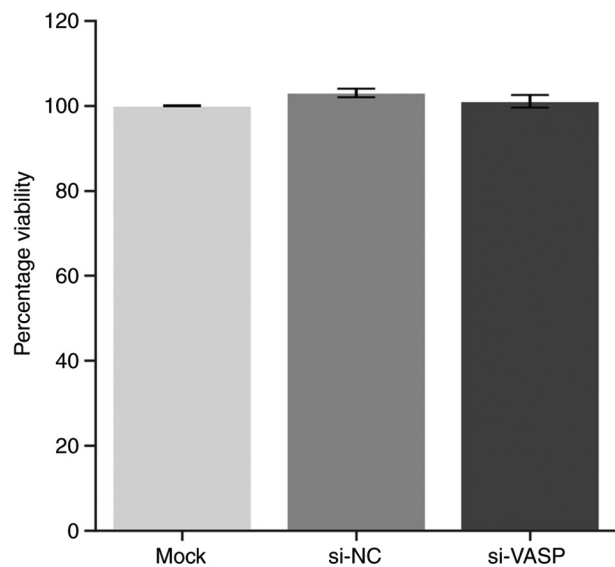

Supplement: Supplementary file 1 [file downloadSupplementary]
